# Supplementary material for: Size and surface chemistry of nanoparticles lead to a variant behavior in the unfolding dynamics of human carbonic anhydrase
Source: Royal Society of Chemistry journal article supplement (doi:10.1039/c5nr05360a), 2015-01-01
Supplement: c5nr05360a1.pdf [file c5nr05360a1.pdf]

Supplementary Information for

# Size and surface chemistry of nanoparticles lead to a variant behavior in the dynamics of human carbonic anhydrase unfolding

Irem Nasir, Martin Lundqvist, Celia Cabaleiro-Lago

Table S1: Hydrodynamic Diameter, PDI and Zeta Potential of PS-COOH and Si particles in 10 mM TRIS pH 8.4

| Particle Type | Diameter/nm | PDI  | ζ-Potential |
|---------------|-------------|------|-------------|
| PS-COOH       | 26±0.5      | 0.11 | -36±2       |
|               | 49±5        | 0.01 | -45±1       |
|               | 94±2        | 0.01 | -48±1       |
| Si            | 23±0.1      | 0.1  | -33±2       |
|               | 34±0.6      | 0.07 | -37±2       |
|               | 90±1        | 0.12 | -50±1       |

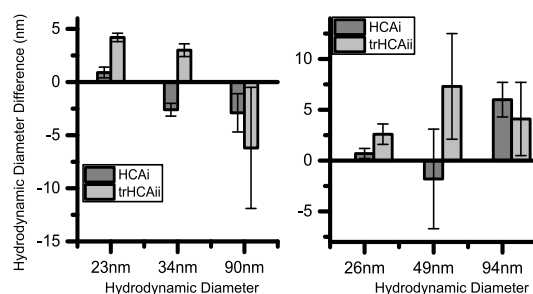

Figure S1: Hydrodynamic diameter difference between protein:nanoparticle complex and nanoparticle control for Left) Silica and Right) PS-COOH nanoparticles

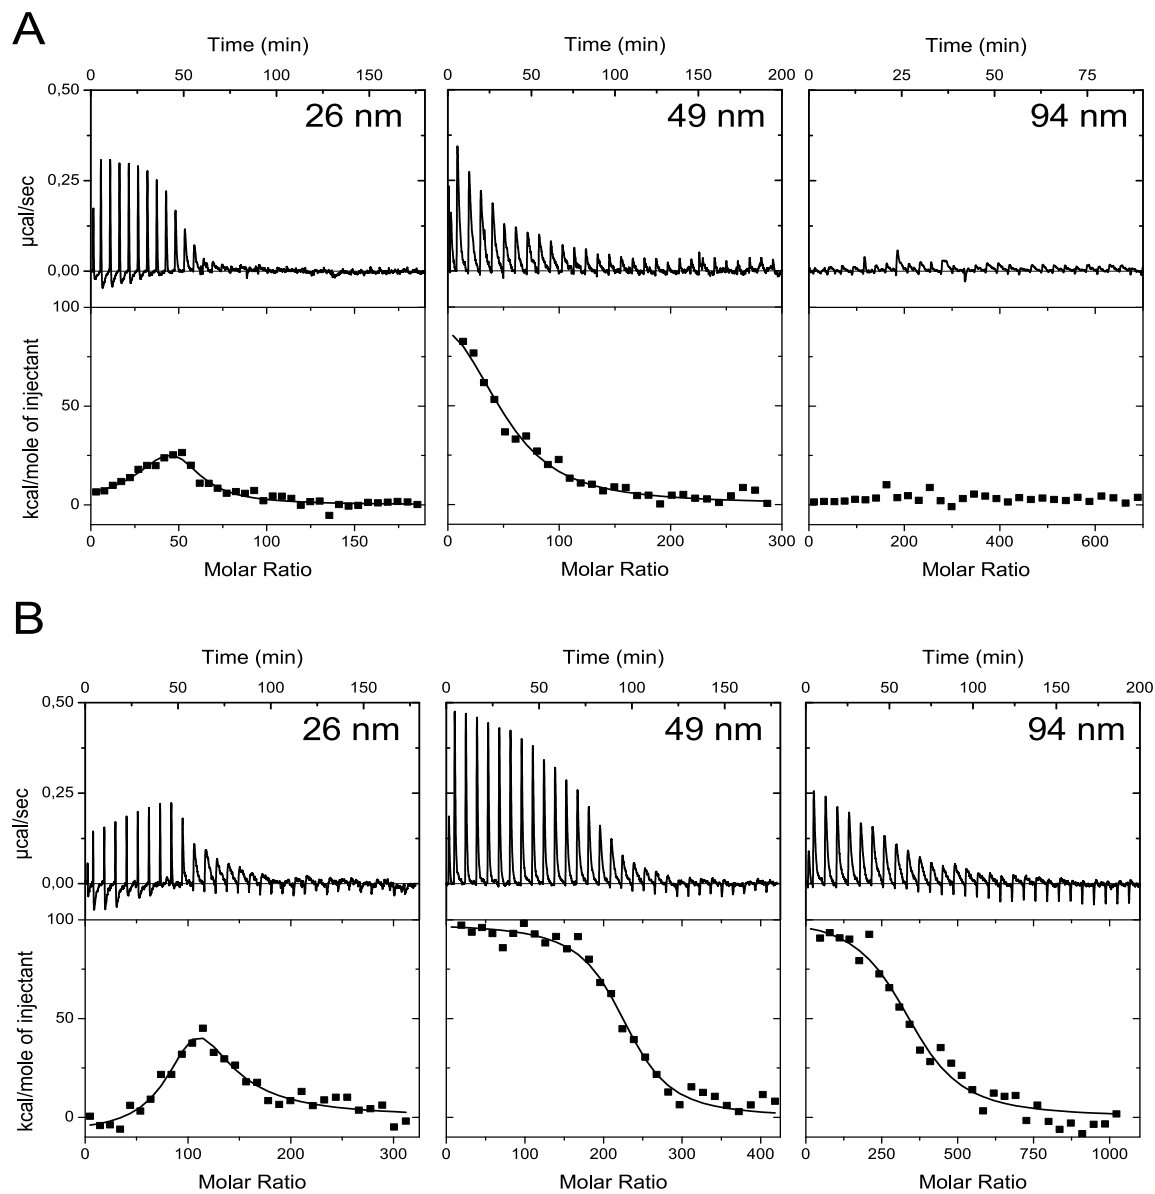

Figure S2: ITC data for the titrations of a) HCAi b) trHCAii into PS-COOH nanoparticles of different sizes in 10 mM Tris pH 8.4 buffer at 30°C. Each panel shows the raw data on top and the integrated heats in the bottom.

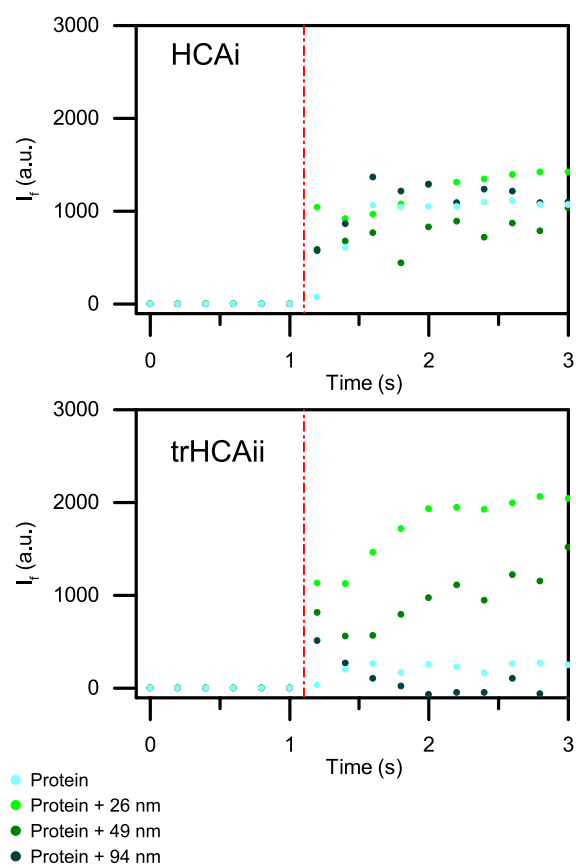

Figure S3: ANS fluorescence in first 3 seconds of the experiment as shown in Fig. 3 in the main text. Red dashed line is the injection point at 1.1 s.

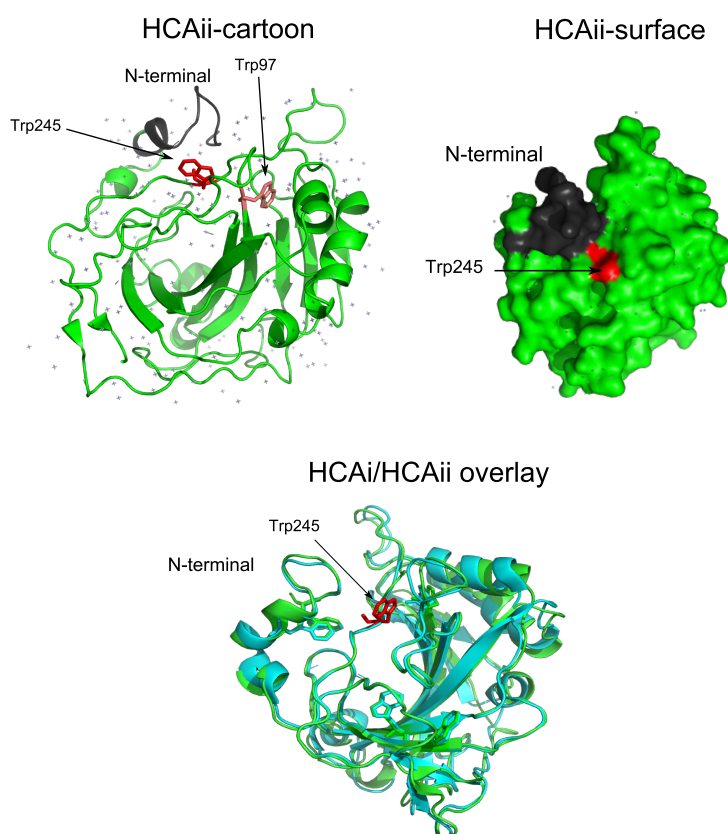

Figure S4: Structural representations of the proteins used in the study. Cyan: HCAi (pdbID: 2cab) and green: HCAii (pdbID: 1ca2). Truncated N-terminal of HCAii is represented by gray color.
